# Supplementary material
Source: PubMed Central journal article supplement (PMC3396559)

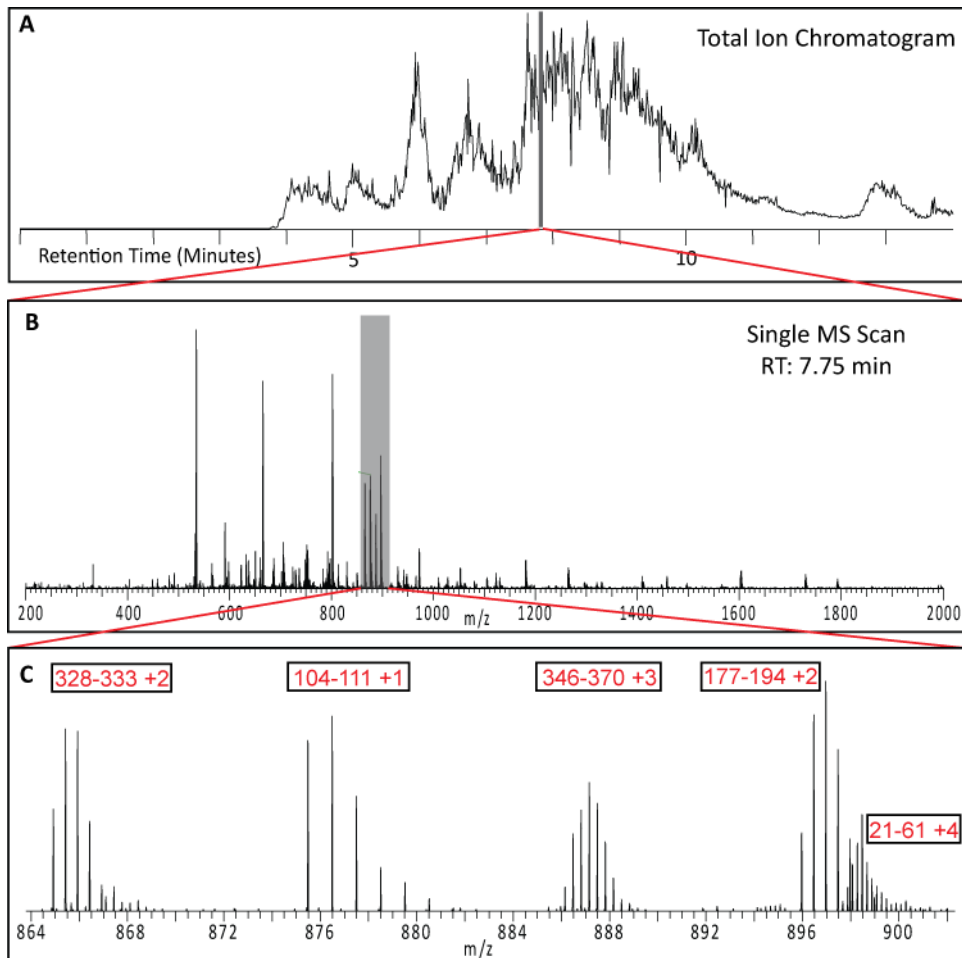

**Figure S1. Illustration of peptide fragment separation.** Proteolytic peptides (from maltose binding protein) obtained as in Fig. 1 are separated roughly by C18 reversed phase HPLC using a shaped gradient to spread eluant peptides. Eluant is fed by electrospray into the mass spectrometer which repeatedly scans the entire mass spectrum (~1 sec/scan). From the total ion chromatogram in panel A, one scan is shown in B and expanded in C.

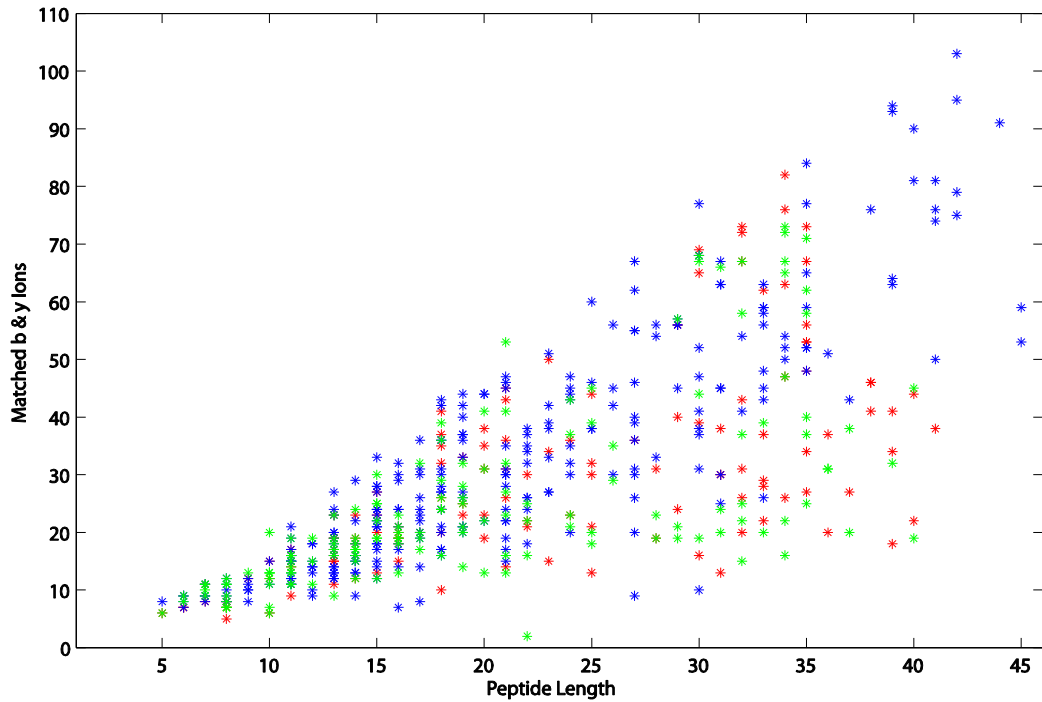

**Figure S2. On the quality of MS/MS peptide identification.** The number of b and y ions found for  $\alpha$ -synuclein peptide fragments is plotted against the size of the peptide. Data sets obtained with the three different proteolysis conditions are merged (pepsin – red; fungal protease XIII – blue; the two in tandem – green). The large number of matching b and y ions found speaks for the quality of the MS/MS identifications. Of the 543 peptides found (all three protease combinations), only one has a suspiciously low number of daughter ions.

**Table S1.** The steps of peptide recognition and filtering used and the peptide survival record at each step. MS/MS runs used a CID top four method with dynamic exclusion and two replicates with static exclusion of peptides previously identified. MS/MS data were analyzed by SEQUEST (Bioworks) to create a peptide list to be used in ExMS analysis of MS data. The peptide list was culled at  $P_{\text{pep}} < 0.990$  to reduce false identifications to 1/1000, and culled further by removing peptides not definitively found by the ExMS program in trial MS runs with all-H and 50% D-exchanged protein. Items marked “merge” reflect the culling of redundantly found peptide ions. “Unique” means that peptides in more than one charge state are only counted once. The progression of peptide MS/MS identification shows that more peptides could be obtained. additional MS/MS steps and by additional proteolytic manipulations (different exposure time, other proteases).

**Alpha-Synuclein (140 residues)**

| <b>Tandem MS Analysis</b>      | <b>Pepsin</b> | <b>FP XIII</b>          | <b>Pepsin+FP</b> |              |            |
|--------------------------------|---------------|-------------------------|------------------|--------------|------------|
| MS/MS Run 1 (P=0.990)          | 84            | 154                     | 94               |              |            |
| MS/MS Run 2 (P=0.990)          | 53            | 93                      | 51               |              |            |
| MS/MS Run 3 (P=0.990)          | 39            | 66                      | 51               |              |            |
| MS/MS Merge                    | 129           | 267                     | 147              | <b>Merge</b> | 418        |
| Unique Peptides                | 78            | 163                     | 97               |              | 255        |
| Unique Peptides / Residue      | 0.6           | 1.2                     | 0.7              |              | 1.8        |
| <b>ExMS Analysis</b>           | <b>Pepsin</b> | <b>FP XIII</b>          | <b>Pepsin+FP</b> |              |            |
| Survive All H Trial (Unique)   | 77            | 163                     | 96               |              |            |
| Survive 50% D Trial 1 (Unique) | 62            | 150                     | 89               |              |            |
| Survive 50% D Trial 2 (Unique) | 62            | 150                     | 91               | <b>Merge</b> |            |
| Survive All Above (Unique)     | 59            | 145                     | 88               |              | <b>222</b> |
| Unique Peptides / Residue      | 0.4           | 1.0                     | 0.6              |              | <b>1.6</b> |
|                                |               | <b>Average Coverage</b> |                  |              | <b>29</b>  |

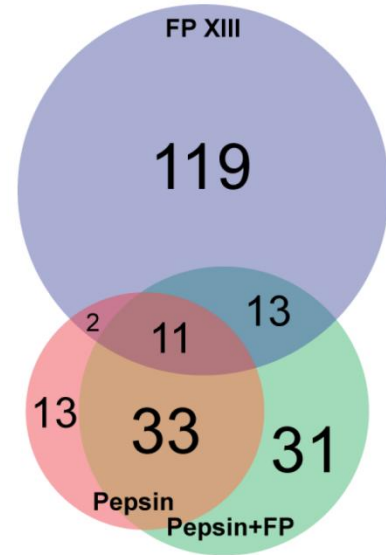

**Apolipoprotein A-I (243 residues)**

| <b>Tandem MS Analysis</b>      | <b>Pepsin</b> | <b>FP XIII</b>          | <b>Pepsin+FP</b> |              |            |
|--------------------------------|---------------|-------------------------|------------------|--------------|------------|
| MS/MS Run 1 (P=0.5)            | 107           | 92                      | 98               |              |            |
| MS/MS Run 2 (P=0.5)            | 65            | 42                      | 62               | <b>Merge</b> |            |
| MS/MS Merge                    | 172           | 134                     | 160              |              | 411        |
| Unique Peptides                | 145           | 124                     | 143              |              | 298        |
| Unique Peptides / Residue      | 0.6           | 0.5                     | 0.6              |              | 1.2        |
| <b>ExMS Analysis</b>           | <b>Pepsin</b> | <b>FP XIII</b>          | <b>Pepsin+FP</b> |              |            |
| Survive All H Trial (Unique)   | 141           | 112                     | 123              |              |            |
| Survive 50% D Trial 1 (Unique) | 129           | 111                     | 106              |              |            |
| Survive 50% D Trial 2 (Unique) | 129           | 102                     | 115              | <b>Merge</b> |            |
| Survive All Above (Unique)     | 125           | 92                      | 94               |              | <b>239</b> |
| Unique Peptides / Residue      | 0.5           | 0.4                     | 0.4              |              | <b>1.0</b> |
|                                |               | <b>Average Coverage</b> |                  |              | <b>11</b>  |

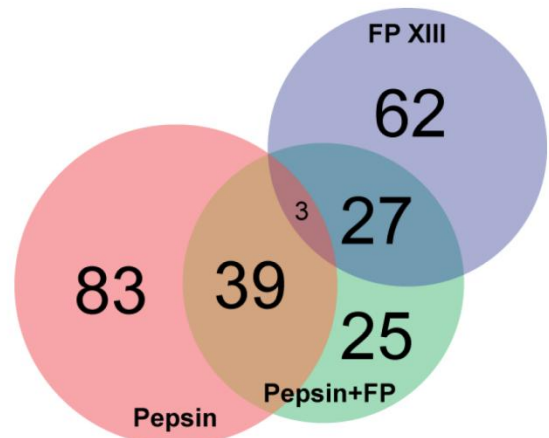

**Maltose Binding Protein (370 residues)**

| <u>Tandem MS Analysis</u> | <u>Pepsin</u> | <u>FP XIII</u> | <u>Pepsin+FP</u> |              |
|---------------------------|---------------|----------------|------------------|--------------|
| MS/MS Run 1 (P=0.990)     | 274           | 148            | 217              |              |
| MS/MS Run 2 (P=0.990)     | 195           | 92             | 105              |              |
| MS/MS Run 3 (P=0.990)     | 42            | 40             | 57               | <b>Merge</b> |
| MS/MS Merge               | 493           | 242            | 379              | 847          |
| Unique Peptides           | 439           | 137            | 105              | 608          |
| Unique Peptides / Residue | 1.2           | 0.4            | 0.7              | 1.6          |

| <u>ExMS Analysis</u>           | <u>Pepsin</u> | <u>FP XIII</u> | <u>Pepsin+FP</u> |              |
|--------------------------------|---------------|----------------|------------------|--------------|
| Survive All H Trial (Unique)   | 438           | 137            | 251              |              |
| Survive 50% D Trial 1 (Unique) | 365           | 122            | 245              |              |
| Survive 50% D Trial 2 (Unique) | 380           | 127            | 230              | <b>Merge</b> |
| Survive All Above (Unique)     | 258           | 91             | 189              | 443          |
| Unique Peptides / Residue      | 0.7           | 0.3            | 0.5              | 1.2          |

**Average Coverage 14**

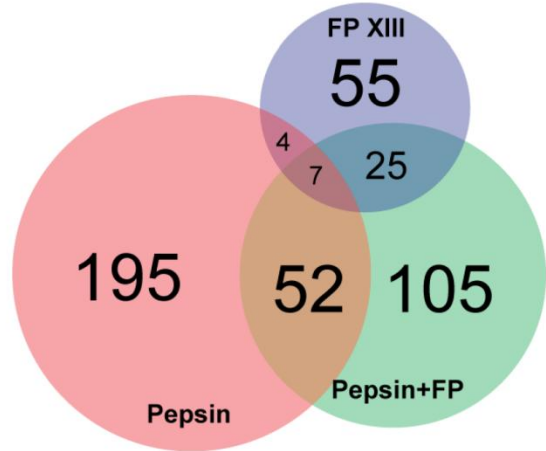

**Hsp104 (908 residues)**

| <u>Tandem MS Analysis</u> | <u>Pepsin</u> | <u>FP XIII</u> | <u>Pepsin+FP</u> |              |
|---------------------------|---------------|----------------|------------------|--------------|
| MS/MS Run 1 (P=0.990)     | 402           | 205            | 390              |              |
| MS/MS Run 2 (P=0.990)     | 240           | 92             | 287              |              |
| MS/MS Run 3 (P=0.990)     | 232           | 61             | 284              | <b>Merge</b> |
| MS/MS Merge               | 618           | 320            | 564              | 1200         |
| Unique Peptides           | 395           | 262            | 441              | 840          |
| Unique Peptides / Residue | 0.4           | 0.3            | 0.5              | 0.9          |

| <u>ExMS Analysis</u>           | <u>Pepsin</u> | <u>FP XIII</u> | <u>Pepsin+FP</u> |              |
|--------------------------------|---------------|----------------|------------------|--------------|
| Survive All H Trial (Unique)   | 395           | 262            | 439              |              |
| Survive 50% D Trial 1 (Unique) | 384           | 191            | 320              |              |
| Survive 50% D Trial 2 (Unique) | 375           | 162            | 337              | <b>Merge</b> |
| Survive All Above (Unique)     | 373           | 154            | 312              | 664          |
| Unique Peptides / Residue      | 0.4           | 0.2            | 0.3              | 0.7          |

**Average Coverage 10**

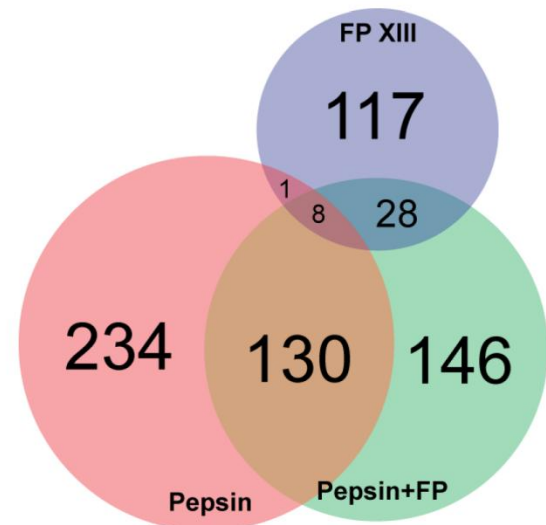

Supplement: NIHMS386854-supplement-supplement_1.pdf [file NIHMS386854-supplement-supplement_1.pdf]
